# Supplementary material
Source: PubMed Central journal article supplement (PMC3925276)
Supplement: ejhg2013148x1.pdf [file ejhg2013148x1.pdf]

Vondráčková et al. Large copy number variations in combination with point mutations in the *TYMP* and *SCO2* genes found in two patients with mitochondrial disorders

Supplementary Figures

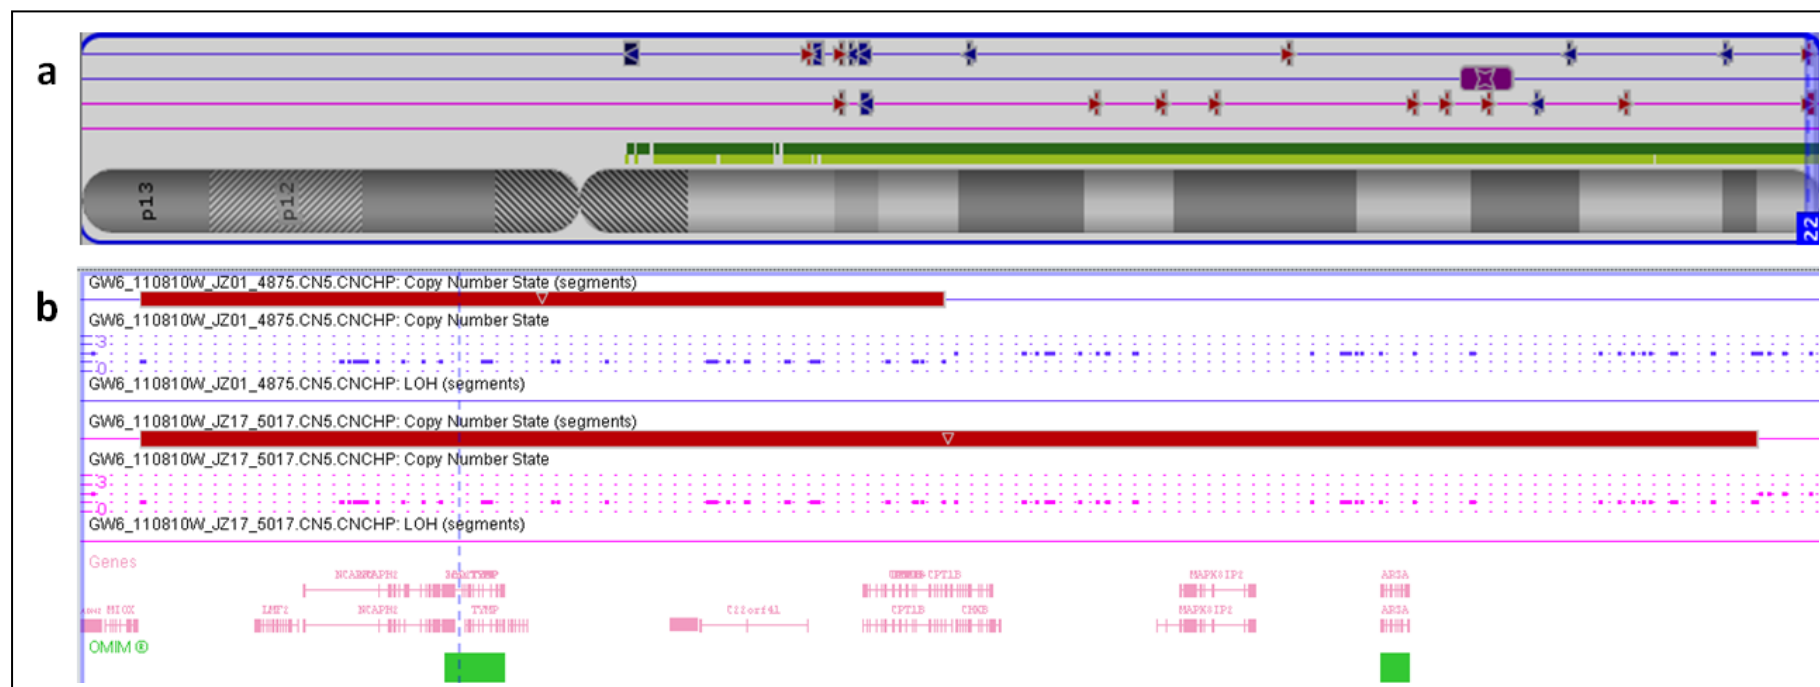

Supplementary figure 1

The output data of the Chromosome Analysis Suite (Affymetrix) of two patients with mitochondrial disease. (a) The blue region surrounds the causal large heterozygous deletions on chromosome 22q13.33 found in the patients. Blue arrows indicate losses of DNA, and red arrows indicate gains of DNA. (b) The thick red lines show large heterozygous deletions. In *SCO2* patient 1, the 87-kb deleted region covers eight genes: *LMF2*, *NCAPH2*, *SCO2*, *TYMP*, *ODF3B*, *KLHDC7B*, *c22orf41*, and *CPT1B* (violet dotted lines). In MNGIE patient 2, the 175-kb deleted region covers

twelve genes: *LMF2*, *NCAPH2*, *SCO2*, *TYMP*, *ODF3B*, *KLHDC7B*, *c22orf41*, *CPT1B*, *CHKB*, *LOC100144603*, *MAPKIP2*, and *ARSA* (pink dotted lines).

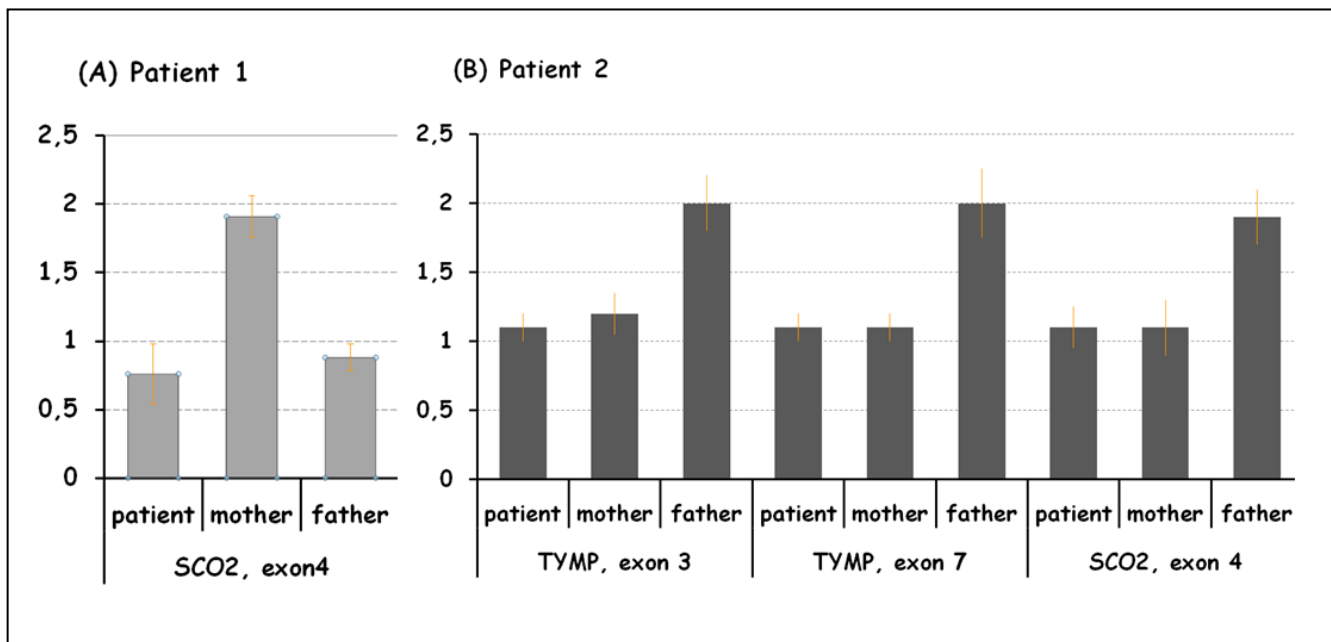

### Supplementary figure 2

A real-time PCR copy-number variation assay was used to verify the absolute copy number status in two affected patients harbouring two different large heterozygous deletions: (A) in *SCO2*-deficient patient, (B) in MNGIE patient.

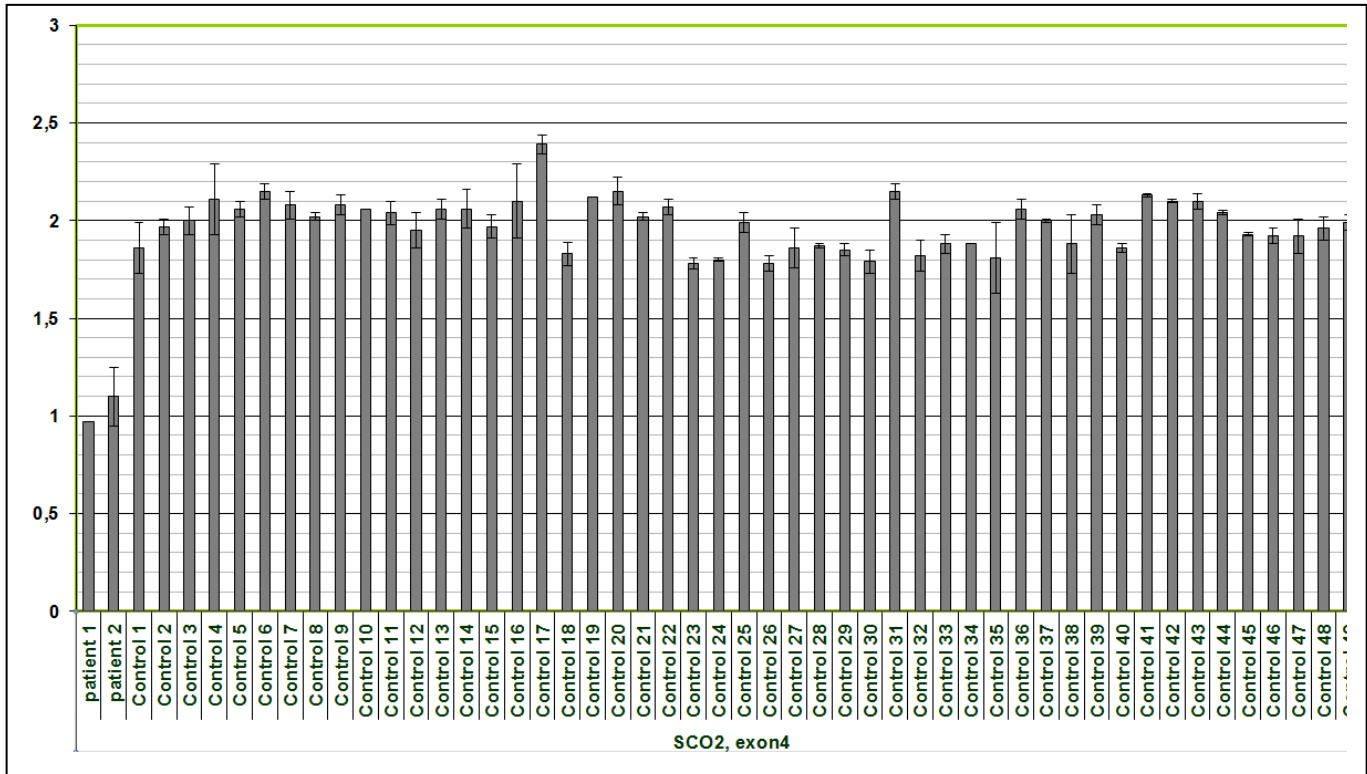

### Supplementary figure 3

A real-time PCR copy-number variation assay of the *SCO2* gene was carried out in 50 control samples. With the exception of our two patients and/or their parents, no other deletions of the *SCO2* gene were detected in the Czech population.
