# Supplementary material
Source: PubMed Central journal article supplement (PMC3925276)
Supplement: ejhg2013148x2.pdf [file ejhg2013148x2.pdf]

**Vondráčková et al. Large copy number variations in combination with point mutations in the *TYMP* and *SCO2* genes found in two patients with mitochondrial disorders**

**Supplementary Tables**

**Table 1:** Hemizygous genes on 22q13.33 found in our patients

| <b>Gene (MIM no.)</b>     | <b>Description of the gene</b>                             | <b>Phenotype of the disease (MIM no.)</b>                                              | <b>Type of inheritance</b> | <b>Hemizygous in patient</b>     |
|---------------------------|------------------------------------------------------------|----------------------------------------------------------------------------------------|----------------------------|----------------------------------|
| <i>LMF2</i><br>(-)        | lipase maturation factor 2                                 | -                                                                                      | -                          | Patient 1,2                      |
| <i>NCAPH2</i> (611230)    | condensin II complex, non-SMC subunit 2                    | -                                                                                      | -                          | Patient 1,2                      |
| <i>SCO2</i><br>(604272)   | cytochrome c oxidase assembly protein                      | fatal infantile cardioencephalomyopathy due to cytochromec oxidase deficiency (604377) | AR                         | Patient 1,2                      |
| <i>TYMP</i><br>(131222)   | thymidine phosphorylase                                    | mitochondrial DNA depletion syndrome 1 (603041)                                        | AR                         | Patient 1,2                      |
| <i>ODF3B</i><br>(-)       | outer dense fiber of sperm tails 3B                        | -                                                                                      | -                          | Patient 1,2                      |
| <i>KLHDC7B</i><br>(-)     | kelch domain containing 7B                                 | -                                                                                      | -                          | Patient 1,2                      |
| <i>c22orf41</i><br>(-)    | synaptonemal complex central element protein 3             | -                                                                                      | -                          | Patient 1,2                      |
| <i>CPT1B</i><br>(601987)  | muscle carnitine palmitoyltransferase 1B                   | -                                                                                      | AR in mice                 | Patient 1,2                      |
| <i>CHKB</i><br>(612395)   | choline kinase beta                                        | muscular dystrophy, congenital megaconial type (602541)                                | AR                         | Patient 1 (partially), patient 2 |
| <i>LOC10144603</i><br>(-) | -                                                          | -                                                                                      | -                          | Patient 2                        |
| <i>MAPK8IP2</i> (607755)  | mitogen-activated protein kinase 8 - interacting protein 2 | -                                                                                      | -                          | Patient 2                        |
| <i>ARSA</i><br>(607574)   | arylsulfatase A                                            | metachromatic leukodystrophy (250100)                                                  | AR                         | Patient 2                        |

**Table 2:** Clinical features of 12 Czech and 44 patients reported in the literature with SCO2 deficiency.

|                              | Czech patients<br>(n=9)<br>non-neonatal presentation | Czech patients<br>(n=3)<br>neonatal onset | Reported cases in the literature<br>(n=25)<br>non-neonatal presentation | Reported cases in the literature<br>(n=19)<br>neonatal onset   |
|------------------------------|------------------------------------------------------|-------------------------------------------|-------------------------------------------------------------------------|----------------------------------------------------------------|
| Reference                    | current report and <sup>1,2</sup>                    | <sup>3</sup>                              | <sup>4, 5, 6, 7, 8¶</sup>                                               | <sup>4, 6, 9, 10, 11, 12, 13, 14, 15, 16, 17, 18, 19, 20</sup> |
| Gender (male/female)         | 4/5                                                  | 2/1                                       | 10/14 <sup>£</sup>                                                      | 10/9                                                           |
| Onset of symptoms            | 3.3 ± 1.5 months<br>(1.5 - 6)                        | < 1 months                                | 5 ± 2.2 months<br>(2 - 10)                                              | < 1 months                                                     |
| Survival                     | none                                                 | none                                      | 5/25 <sup>§</sup>                                                       | 1/19 <sup>£</sup>                                              |
| Age of death                 | 11.7 ± 7 months<br>(4 - 28)                          | < 3 months                                | 17 ± 15 months<br>(5 - 60 months)                                       | 2.7 ± 2.5 months<br>(25 days - 11 months)                      |
| IUGR                         | 0/9 (0)                                              | 0/2 (0)                                   | 1/4 <sup>Ω</sup>                                                        | 3/18 (17)                                                      |
| Prematurity                  | 0/9 (0)                                              | 1/3 (33)                                  | 0/4 <sup>Ω</sup>                                                        | 1/18 (6)                                                       |
| Inspiratory stridor          | 5/9 (56)                                             | 2/3 (67)                                  | 13/21 (62)                                                              | 7/11 (64)                                                      |
| Hypotonia                    | 8/9 (89)*                                            | 3/3 (100)                                 | 25/25 (100) <sup>Ψ</sup>                                                | 19/19 (100)                                                    |
| Leigh/Leigh-like syndrome    | 2/9 (22)                                             | 0/3 (0)                                   | 7/22 (32)                                                               | 6/17 (35)                                                      |
| Psychomotor delay/regression | 9/9 (100)                                            | n.a                                       | 23/25 (92)                                                              | n.a                                                            |
| Movement disorder            | 3/9 (34)                                             | n.a                                       | 0/20 (0)                                                                | n.a                                                            |
| Ataxia                       | 1/9 (11)                                             | n.a                                       | 0/20 (0)                                                                | n.a                                                            |
| Seizures                     | 1/9 (11)                                             | 1/3 (33)                                  | 5/21 (24)                                                               | 7/16 (44)                                                      |
| Ptosis                       | 2/9 (22)                                             | 0/3 (0)                                   | 7/22 (32)                                                               | 1/12 (8)                                                       |
| HCMP                         | 4/9 (44)                                             | 3/3 (100)                                 | 14/23 (61)                                                              | 19/19 (100)                                                    |
| SMA-like phenotype           | 4/9 (44)                                             | n.d                                       | 12/21 (57)                                                              | 7/11 (64)                                                      |

clinical features are expressed in % in brackets

abbreviations: n.a: not applicable ; n.d: not determined; HCMP: hypertrophic cardiomyopathy; SMA: spinal muscular atrophy

¶ Sambuughin et al: all three patients suffered from infantile hyperthermia

£ not reported in one patient

§ survival or age of death is not reported in four cases; only one patient was still alive at the time of publication (25 months old girl)

Ω not reported in majority of published non-neonatal cases

\* acral spasticity in one patient

Ψ in many patients axial hypotonia was combined with acral spasticity (the exact number of patients was not further specified in original paper - Pronicki et al. 2010)

### References:

1. Vesela K, Hansikova H, Tesarova M *et al*: Clinical, biochemical and molecular analyses of six patients with isolated cytochrome c oxidase deficiency due to mutations in the SCO2 gene. *Acta Paediatr* 2004; **93**: 1312-1317.
2. Vesela K, Hulkova H, Hansikova H, Zeman J, Elleder M: Structural analysis of tissues affected by cytochrome C oxidase deficiency due to mutations in the SCO2 gene. *APMIS* 2008; **116**: 41-49.
3. Honzik T, Tesarova M, Magner M *et al*: Neonatal onset of mitochondrial disorders in 129 patients: clinical and laboratory characteristics and a new approach to diagnosis. *J Inherit Metab Dis* 2012; **35**: 749-759.
4. Papadopoulou LC, Sue CM, Davidson MM *et al*: Fatal infantile cardioencephalomyopathy with COX deficiency and mutations in SCO2, a COX assembly gene. *Nat Genet* 1999; **23**: 333-337.
5. Freisinger P, Horvath R, Macmillan C, Peters J, Jaksch M: Reversion of hypertrophic cardiomyopathy in a patient with deficiency of the mitochondrial copper binding protein Sco2: is there a potential effect of copper? *J Inherit Metab Dis* 2004; **27**: 67-79.
6. Pronicki M, Kowalski P, Piekutowska-Abramczuk D *et al*: A homozygous mutation in the SCO2 gene causes a spinal muscular atrophy like presentation with stridor and respiratory insufficiency. *Eur J Paediatr Neurol* 2010; **14**: 253-260.
7. Sambuughin N, Liu X, Bijarnia S *et al*: Exome sequencing reveals SCO2 mutations in a family presented with fatal infantile hyperthermia. *J Hum Genet* 2013.
8. Jaksch M, Horvath R, Horn N *et al*: Homozygosity (E140K) in SCO2 causes delayed infantile onset of cardiomyopathy and neuropathy. *Neurology* 2001; **57**: 1440-1446.
9. Jaksch M, Ogilvie I, Yao J *et al*: Mutations in SCO2 are associated with a distinct form of hypertrophic cardiomyopathy and cytochrome c oxidase deficiency. *Hum Mol Genet* 2000; **9**: 795-801.
10. Sue CM, Karadimas C, Checcarelli N *et al*: Differential features of patients with mutations in two COX assembly genes, SURF-1 and SCO2. *Ann Neurol* 2000; **47**: 589-595.
11. Salviati L, Sacconi S, Rasalan MM *et al*: Cytochrome c oxidase deficiency due to a novel SCO2 mutation mimics Werdnig-Hoffmann disease. *Arch Neurol* 2002; **59**: 862-865.
12. Sacconi S, Salviati L, Sue CM *et al*: Mutation screening in patients with isolated cytochrome c oxidase deficiency. *Pediatr Res* 2003; **53**: 224-230.
13. Tarnopolsky MA, Bourgeois JM, Fu MH *et al*: Novel SCO2 mutation (G1521A) presenting as a spinal muscular atrophy type I phenotype. *Am J Med Genet A* 2004; **125A**: 310-314.
14. Tay SK, Shanske S, Kaplan P, DiMauro S: Association of mutations in SCO2, a cytochrome c oxidase assembly gene, with early fetal lethality. *Arch Neurol* 2004; **61**: 950-952.
15. Leary SC, Mattman A, Wai T *et al*: A hemizygous SCO2 mutation in an early onset rapidly progressive, fatal cardiomyopathy. *Mol Genet Metab* 2006; **89**: 129-133.
16. Verdijk RM, de Krijger R, Schoonderwoerd K *et al*: Phenotypic consequences of a novel SCO2 gene mutation. *Am J Med Genet A* 2008; **146A**: 2822-2827.
17. Mobley BC, Enns GM, Wong LJ, Vogel H: A novel homozygous SCO2 mutation, p.G193S, causing fatal infantile cardioencephalomyopathy. *Clin Neuropathol* 2009; **28**: 143-149.

18. Joost K, Rodenburg R, Piirsoo A, van den Heuvel B, Zordania R, Ounap K: A novel mutation in the SCO2 gene in a neonate with early-onset cardioencephalomyopathy. *Pediatr Neurol* 2010; **42**: 227-230.
19. Gurgel-Giannetti J, Oliveira G, Brasileiro Filho G, Martins P, Vainzof M, Hirano M: Mitochondrial cardioencephalomyopathy due to a novel SCO2 mutation in a Brazilian patient: case report and literature review. *JAMA Neurol* 2013; **70**: 258-261.
20. Knuf M, Faber J, Huth RG, Freisinger P, Zepp F, Kampmann C: Identification of a novel compound heterozygote SCO2 mutation in cytochrome c oxidase deficient fatal infantile cardioencephalomyopathy. *Acta Paediatr* 2007; **96**: 130-132.
