# Supplementary material
Source: PubMed Central journal article supplement (PMC3925276)
Supplement: ejhg2013148x3.pdf [file ejhg2013148x3.pdf]

# Vondráčková et al. Large copy number variations in combination with point mutations in the *TYMP* and *SCO2* genes found in two patients with mitochondrial disorders

## Supplementary Methods

### *Thymidine levels in plasma*

Thymidine and deoxyuridine levels were analysed by reversed-phase high-performance liquid chromatography with UV detection.<sup>1,2</sup>

### *Thymidine phosphorylase activity*

Thymidin phosphorylase activity was measured spectrophotometrically in isolated lymphocytes according to Spinazzola et al.<sup>3</sup> Briefly, lymphocytes were isolated in Ficoll gradient. Lymphocytes were homogenized in lysis buffer (50mM Tris-HCl; pH 7.2, 1% Triton X-100; 2mM PMSF; 0.02% 2-mercaptoethanol), sonicated and centrifuged at 20000g, 4°C for 20 min. In supernatant, protein concentration was determined according to Lowry.<sup>4</sup> 150 mg of supernatant protein was added to reaction mixture (0.2 M Tris, pH 6.5; 0,1 M Na<sub>2</sub>HAsO<sub>4</sub>; 10mM thymidine) and incubated at 37°C for 30 min. The reaction was inhibited by 1 ml of 0.3M NaOH. In the reactions mixture, an amount of thymine was determined spectrophotometrically at 300 nm.

### *Activities of cytochrome c oxidase and citrate synthase*

In patient 2, activity of cytochrome c oxidase and citrate synthase was analysed in lymphocytes isolated in Ficoll gradient, as described previously.<sup>5</sup>

### *SDS-PAGE electrophoresis and immunoblot analysis*

10 µg of mitochondrial protein was separated by tricine SDS-PAGE carried out on 12% polyacrymide as described previously.<sup>6</sup> Proteins were electroblotted from the gels on to Immobilon<sup>TM</sup>-P PVDF membranes (Millipore, Carrigtwohill, Ireland) using semi-dry transfer. The membranes were decorated with rabbit polyclonal antiserum raised against human SCO2 (1:1000), with mouse monoclonal antibodies raised against cytochrome c oxidase subunits COX1 (Abcam-Mitosciences, Eugene (OR), USA; 1 µg/ml), COX2 (Abcam-Mitosciences; 1 µg/ml) and porin (Abcam-Mitosciences; 1 µg/ml) under the same conditions as described previously.<sup>6</sup>

### *Total copper content in tissues*

The total copper content in the dry matter of liver, brain and muscle tissues was assessed by FAA (Perkin Elmer 3300 AAS, Perkin-Elmer Corp., USA) or ICP-MS (Elan DRC-e Perkin Elmer SCIEX, PerkinElmer Inc., USA).

## References

1. Morris GS, Simmonds HA: Use of a fundamental elution protocol for the development of reversed-phase high-performance liquid chromatography enabling rapid simultaneous determination of purines, pyrimidines and allied compounds commonly found in human biological fluids. *J Chromatogr* 1985; **344**: 101-113.
2. Marti R, Spinazzola A, Tadesse S, Nishino I, Nishigaki Y, Hirano M: Definitive diagnosis of mitochondrial neurogastrointestinal encephalomyopathy by biochemical assays. *Clin Chem* 2004; **50**: 120-124.

3. Spinazzola A, Marti R, Nishino I *et al*: Altered thymidine metabolism due to defects of thymidine phosphorylase. *J Biol Chem* 2002; **277**: 4128-4133.
4. Lowry OH, Rosebrough NJ, Farr AL, Randall RJ: Protein measurement with the Folin phenol reagent. *J Biol Chem* 1951; **193**: 265-275.
5. Capkova M, Houstek J, Hansikova H, Hainer V, Kunesova M, Zeman J: Activities of cytochrome c oxidase and citrate synthase in lymphocytes of obese and normal-weight subjects. *Int J Obes Relat Metab Disord* 2002; **26**: 1110-1117.
6. Stiburek L, Vesela K, Hansikova H *et al*: Tissue-specific cytochrome c oxidase assembly defects due to mutations in SCO2 and SURF1. *Biochem J* 2005; **392**: 625-632.
